# Supplementary material for: Using null models to infer microbial co-occurrence networks
Source: PubMed Central journal article supplement (PMC5426617; doi:10.1371/journal.pone.0176751), 2017-05-11

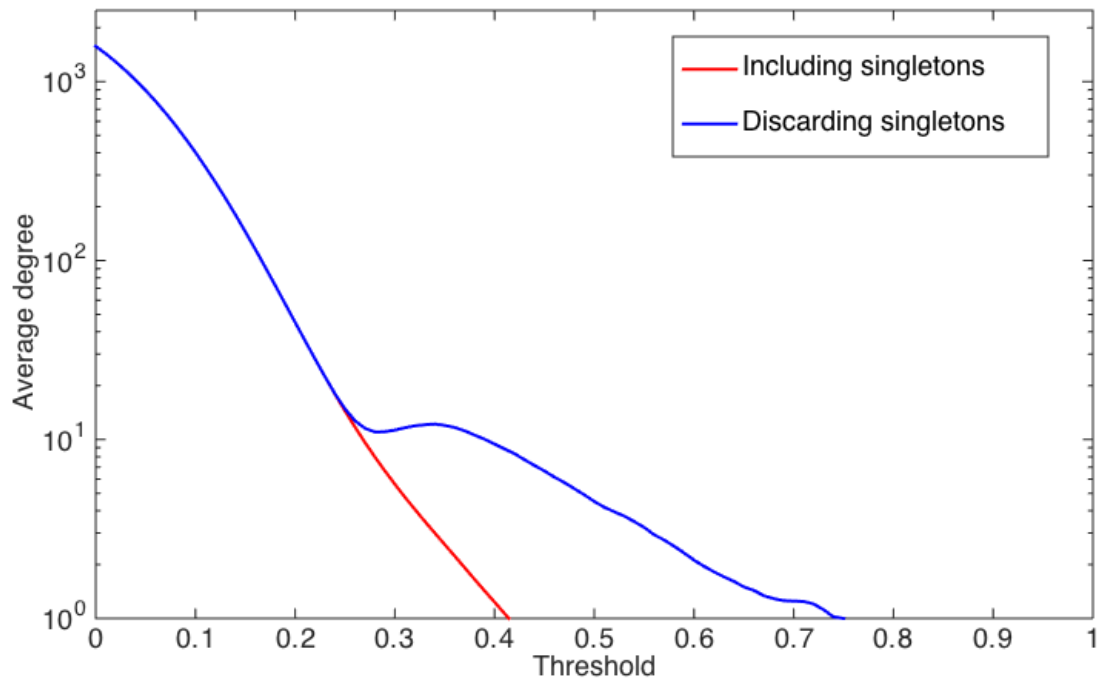

Supplement: pone.0176751.s001.pdf [file pone.0176751.s001.pdf]
